# Supplementary material for: High efficiency of biosurfactants in stabilizing oil micro-droplets within the aging time scale of milliseconds: a microfluidic study
Source: Royal Society of Chemistry journal article supplement (doi:10.1039/d4sm00630e), 2024-01-01
Supplement: d4sm00630e4.pdf [file d4sm00630e4.pdf]

Electronic Supplementary Material for

# High efficiency of biosurfactant in stabilizing oil micro-droplets with millisecond aging time: a microfluidic study

*Zhi-yuan Yang<sup>a</sup>, Shi-zhong Yang<sup>a,b</sup>, Gang-zheng Sun<sup>c,d</sup>, Wei-dong Wang<sup>c</sup>, Fei dan<sup>a</sup>,  
Bo-Zhong Mu<sup>a,b</sup>, Hong-ze Gang<sup>a,b,\*</sup>*

<sup>a</sup> State Key Laboratory of Bioreactor Engineering and School of Chemistry and Molecular Engineering, East China University of Science and Technology, Meilong 130, 200237 Shanghai, P.R. China

<sup>b</sup> Engineering Research Center of Microbial Enhanced Oil Recovery, MOE, East China University of Science and Technology, Meilong 130, Shanghai, 200237, P.R. China

<sup>c</sup> Shengli Oilfield Company, Sinopec, Dongying, 257000, P.R. China

<sup>d</sup> Research Institute of Petroleum Engineering and Technology, Shengli Oilfield Company, Sinopec, Dongying, 257000, P.R. China

This electronic supplementary material includes:

1. The images captured by the high-speed camera in the coalescence chamber of the microfluidic chip are edited into three movies (Movie S1-S3).
2. Results of ESI-MS for biosurfactant C<sub>15</sub>-SFT and chemically synthetic surfactant 8-SCBS (Fig.S1)
3. Three kinds of microfluidic chip designs with different narrow channels to create three aging times used in this work (Fig. S2), volume shared by the micro-droplets in different radii (Fig. S3), micro-droplet radius distribution at different positions of the coalescence chamber (Fig. S4).
4. The calculation of the average coalescence time,  $\bar{t}_v$ .

## **Description of movies**

**Movie S1:** Micro-droplets stabilized by  $1 \times 10^{-4}$  mol/L  $C_{15}$ -SFT at the outlet of the coalescence chamber with 600 ms aging time. Shooting speed: 30 fps; Playing speed: 10 fps.

**Movie S2:** Micro-droplets stabilized by  $1 \times 10^{-4}$  mol/L 8-SCBS at the outlet of the coalescence chamber with 600 ms aging time. Shooting speed: 30 fps; Playing speed: 10 fps.

**Movie S3:** Coalescence event of micro-droplets stabilized by  $1 \times 10^{-6}$  mol/L  $C_{15}$ -SFT at the inlet of the coalescence chamber with 600 ms aging time. Shooting speed: 13600 fps; Playing speed: 60 fps.

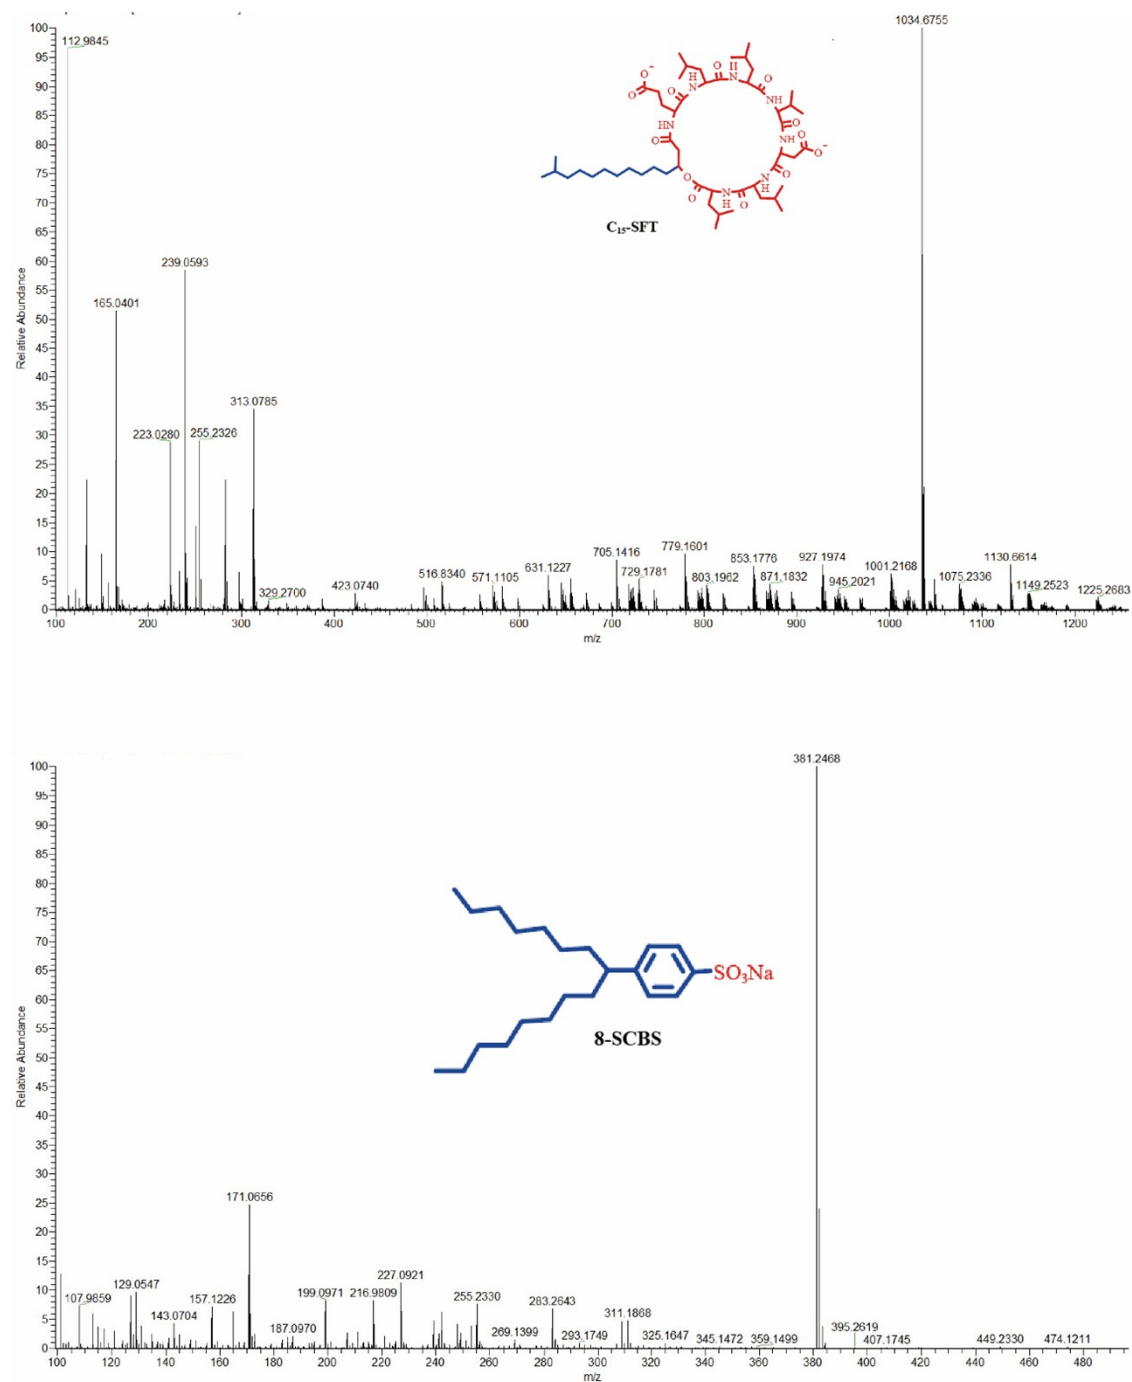

**Fig. S1.** ESI-MS for biosurfactant C<sub>15</sub>-SFT and chemically synthetic surfactant 8-SCBS

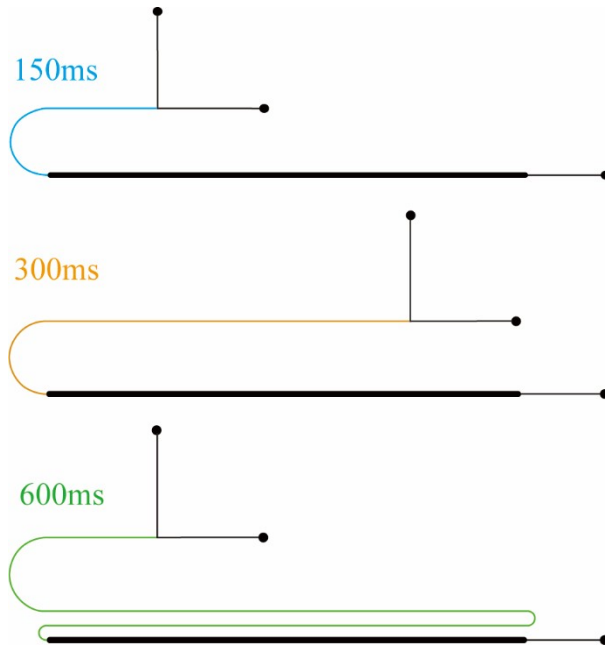

**Fig. S2.** Schematic diagrams of microfluidic chips that have three aging times. (The lengths of the narrow channels in blue, orange, and green are 23.3mm, 46.7mm, and 93.3mm, respectively)

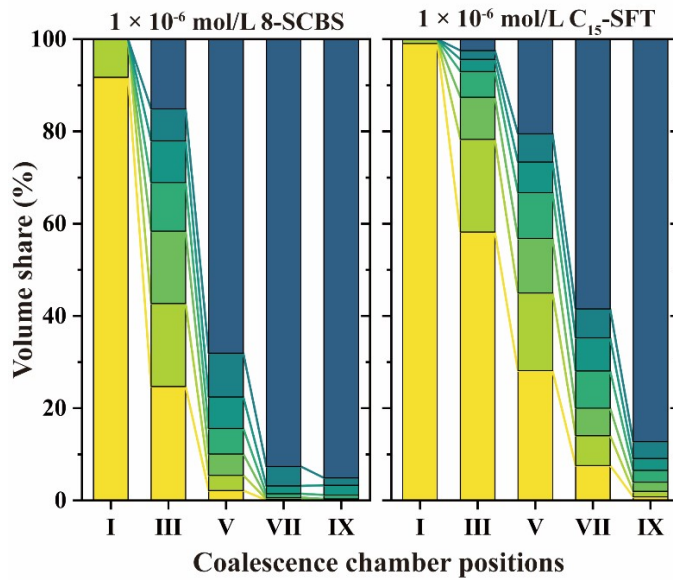

**Fig. S3.** Volumes shared by the micro-droplets in different radii (concentrations of  $\text{C}_{15}\text{-SFT}$  (right panel) and 8-SCBS (left panel) are  $1 \times 10^{-6} \text{ mol/L}$ ). Size1 represents the

micro-droplets in original size, size  $n$  represents the droplets formed by the coalescence of  $n$  original micro-droplets, and size7+ represents the droplets formed by the coalescence of seven or more original micro-droplets.

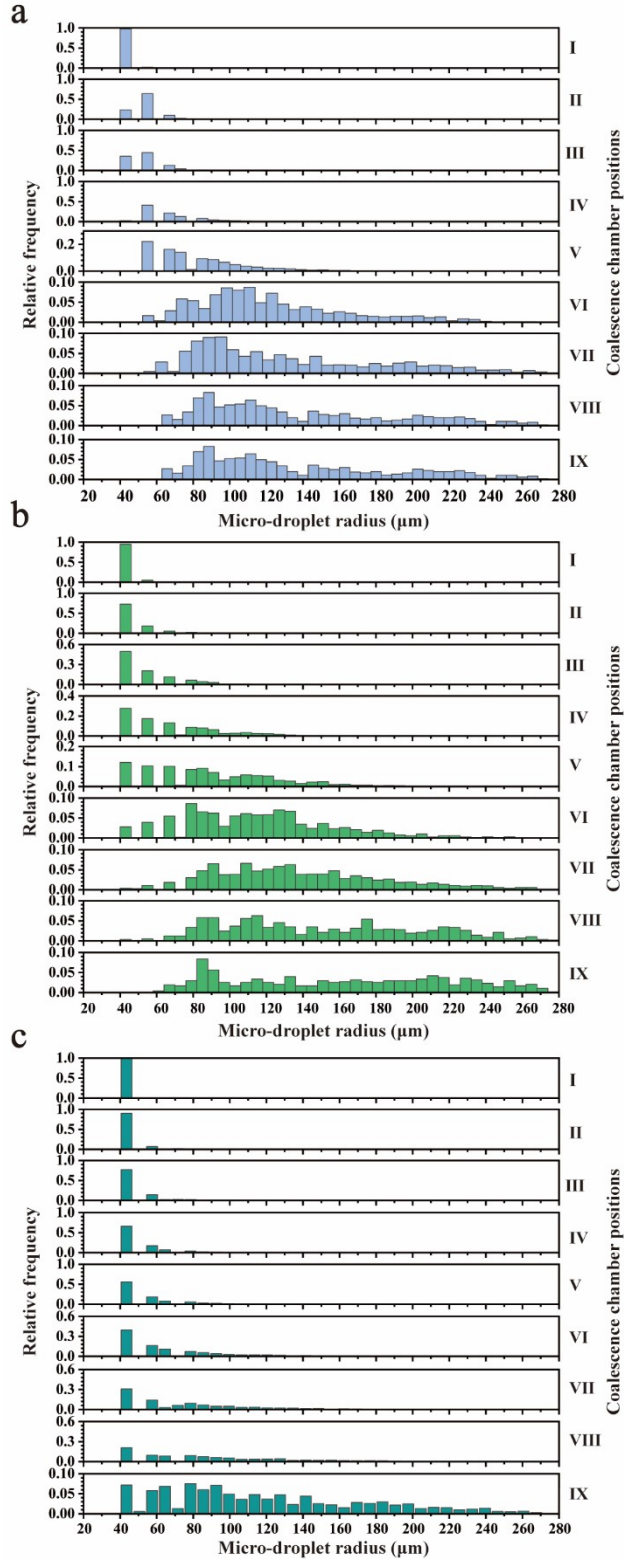

**Fig. S4.** Radius distributions of micro-droplets stabilized by (a)  $1 \times 10^{-6}$  mol/L 8-SCBS, (b)  $1 \times 10^{-4}$  mol/L 8-SCBS, and (c)  $1 \times 10^{-6}$  mol/L C<sub>15</sub>-SFT at different positions in coalescence chamber after 600 ms aging time.

**Averaged coalescence time,  $\bar{t}_v$**

In a coalescence event, one approach velocity corresponds to one coalescence time. All the coalescence events were sorted by approaching velocity, and the averaged coalescence time,  $\bar{t}_v$ , were calculated by the number-average coalescence time of the coalescence events in which the approaching velocities were below  $v$ .

$$\bar{t}_v = \frac{\sum_0^v t_{coal}}{\sum_0^v N}$$
